# Supplementary material for: Carboxylate-functionalized polyoxo-titanium clusters for adsorption/solar photocatalytic synergistic tetracycline degradation
Source: Royal Society of Chemistry journal article supplement (doi:10.1039/d4ta08391a), 2025-01-01
Supplement: d4ta08391a1.pdf [file d4ta08391a1.pdf]

## Electronic Supplementary Information (ESI)

**Carboxylate-functionalized polyoxo-titanium clusters for**

**adsorption/solar photocatalytic synergistic tetracycline degradation**

Shu-Han Wang<sup>‡</sup>, Ming Du<sup>‡</sup>, Hui-Li Guo, Hui-Yuan Chen, Jing-Yu Pang,<sup>\*</sup> Dong-Bin Dang,<sup>\*</sup> and Yan Bai<sup>\*</sup>

Henan Key Laboratory of Polyoxometalate Chemistry, College of Chemistry and Molecular Sciences, Henan University, Kaifeng 475004, PR China.

<sup>‡</sup>These authors contributed equally to this work.

E-mail: pjy@henu.edu.cn, dangdb@henu.edu.cn, baiyan@henu.edu.cn.

## Table of Contents

**Figure S1.** SEM of Ti<sub>6</sub>-BIDC, Ti<sub>6</sub>-CMBA and Ti<sub>6</sub>-MA.

**Figure S2.** XPS spectra of Ti<sub>6</sub>-BIDC, Ti<sub>6</sub>-CMBA and Ti<sub>6</sub>-MA Ti 2p.

**Figure S3.** The as-synthesized and simulated PXRD patterns for (a) Ti<sub>6</sub>-BIDC, (b) Ti<sub>6</sub>-CMBA and (c) Ti<sub>6</sub>-MA.

**Figure S4.** Thermal gravimetric analysis of (a) Ti<sub>6</sub>-BIDC, (b) Ti<sub>6</sub>-CMBA and (c) Ti<sub>6</sub>-MA.

**Figure S5.** FT-IR spectrum of Ti<sub>6</sub>-BIDC, Ti<sub>6</sub>-CMBA and Ti<sub>6</sub>-MA.

**Figure S6.** Molecular packing of compounds Ti<sub>6</sub>-CMBA.

**Figure S7.** Molecular packing of compounds Ti<sub>6</sub>-MA.

**Figure S8.** Curve  $[F(R)hv]^{1/2}$  versus photon energy of Ti<sub>6</sub>-BIDC, Ti<sub>6</sub>-CMBA and Ti<sub>6</sub>-MA.

**Figure S9.** Mott-Schottky of (a) Ti<sub>6</sub>-BIDC, (b) Ti<sub>6</sub>-CMBA and (c) Ti<sub>6</sub>-MA.

**Figure S10.** Adsorption equilibrium curve of Ti<sub>6</sub>-BIDC.

**Figure S11.** UV-vis spectrum of (a) Ti<sub>6</sub>-BIDC, (b) Ti<sub>6</sub>-CMBA and (c) Ti<sub>6</sub>-MA.

**Figure S12.** The kinetics plots of photocatalytic TC over Ti<sub>6</sub>-BIDC, Ti<sub>6</sub>-CMBA and Ti<sub>6</sub>-MA towards TC (50 mg/L).

**Figure S13.** IR spectrum of Ti<sub>6</sub>-BIDC clusters before cycles and after cycles.

**Figure S14.** LC-MS mass spectra of TC photodegradation after 0, 30, 60, 90, 120 and 150 min, respectively.

**Figure S15.** Photocatalytic degradation of MB, RhB, CIP pollutants.

**Table S1.** Crystallographic Data and Structure Refinements for Ti<sub>6</sub>-BIDC, Ti<sub>6</sub>-CMBA and Ti<sub>6</sub>-MA.

**Table S2.** Some main bond length information.

**Table S3.** Some main bond Angle information.

**Table S4.** Bond valence sum (BVS) analysis for Ti<sub>6</sub>-BIDC, Ti<sub>6</sub>-CMBA and Ti<sub>6</sub>-MA.

**Table S5.** The photocatalytic degradation of TC by different photocatalysts reported in literatures.

## Materials and physical measurements

The crystal structure was measured by single crystal diffractometer (XRD, Bruker D8 Venture) with Mo K $\alpha$  at 70 kv radiation ( $\lambda = 0.71073 \text{ \AA}$ ). The infrared spectrum data was recorded in KBr pallets on Fourier transform infrared spectroscopy (FT-IR, Bruker VERTEX) in the range of 400–4000  $\text{cm}^{-1}$ . The purity of the samples were investigated by Powder X-ray diffractometer (PXRD, Bruker D8 Advance) with Cu K $\alpha$  radiation at room temperature. The thermal stability of the samples were measured by Thermogravimetric analyzer (TGA, Perkin-Elmer 7 thermal analyzer) in flowing  $\text{N}_2$  with a slow heating rate of 10  $^\circ\text{C min}^{-1}$ . X-ray photoelectron spectroscopy (XPS, Thermo Scientific K-Alpha) was recorded by instrument with an Al K $\alpha$  micro-focused X-ray source. The ultraviolet-visible diffuse reflectance spectrum of the samples were obtained by an ultraviolet-visible spectrophotometer (DSR, Hitachi UH4150). The photocurrent and impedance of the samples were performed by an electrochemical workstation (CHI 760E). The photoluminescence spectra of the samples were recorded on a fluorescence spectrophotometer (PL, Hitachi f-7000). The Brunauer-Emmett-Teller (BET, Autosorb-2, Quantachrome) surface areas were measured and calculated by nitrogen adsorption-desorption isotherms using an adsorption analyzer.

## Adsorption and photocatalytic performance

The compounds (10 mg) were dispersed in TC (50 mg/L, 50 mL) aqueous solution, respectively. Dark adsorption was carried out in the photocatalytic reactor at the speed of 800 rpm. 2 mL of sample was taken out every 20 min, centrifuged at 8000 rpm and filtered with a 0.22  $\mu\text{m}$  PTFE syringe filter. The light absorption of the solution was measured at 357 nm using a UV-vis spectrophotometer.

*Adsorption rate*(%) =  $100 \times (C_0 - C_t)/C_0$ , where  $C_0$  and  $C_t$  are the initial and retained concentrations of TC, respectively.<sup>1</sup>

The photocatalytic reaction was continued after dark for 3 h when reached adsorption-desorption equilibrium. The light source was a 500 W mercury lamp with a cutoff filter ( $>420 \text{ nm}$ ). 2 mL of sample was taken out and measured by UV-vis spectrophotometer.

*Degradation efficiency*(%) =  $100 \times (C_0 - C_t)/C_0$ , where  $C_0$  and  $C_t$  are the initial and

degradation concentrations of TC, respectively.<sup>1</sup>

### Photoelectrical performance of the compounds

A standard three-electrode system was used to test photocurrent in Na<sub>2</sub>SO<sub>4</sub> solution (0.2 M) on an electrochemical workstation (CHI 760E). A xenon lamp (300 W) equipped with a cutoff filter (>420 nm) served as the light source. The compound-coated electrode, Hg/HgCl<sub>2</sub> electrode and Pt electrode were used as the working, reference and counter electrode, respectively.

### Photodegradation mechanism test ESR

The free radicals generated during the photocatalytic reaction were detected by Bruker A300 electron spin resonator with a light source of 500 W mercury lamp (>420 nm). 10 mg of the sample was added to 1 mL methanol solution at room temperature, and 10 μL DMPO was used as the trapping agent for detection •O<sub>2</sub><sup>-</sup>. 50 μL of TEMPO was dissolved in 5 mL water, and then 10 mg catalyst sample was placed into 1 mL trapping agent solution for h<sup>+</sup> detection. The free radical signal in the reaction was detected at 0, 5 and 10 min respectively.

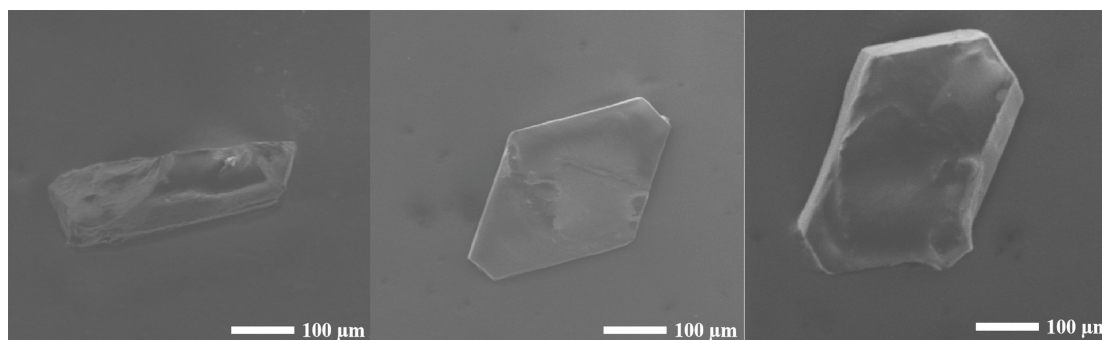

**Figure S1.** SEM of Ti<sub>6</sub>-BIDC, Ti<sub>6</sub>-CMBA and Ti<sub>6</sub>-MA.

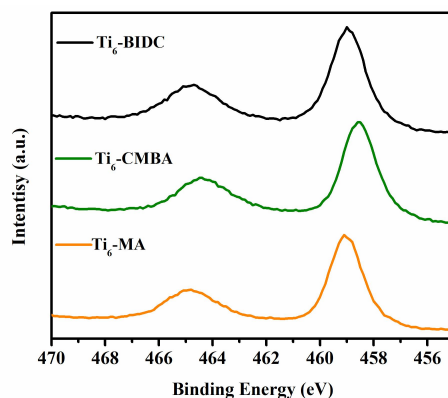

**Figure S2.** XPS spectra of  $Ti_6$ -BIDC,  $Ti_6$ -CMBA and  $Ti_6$ -MA Ti 2p.

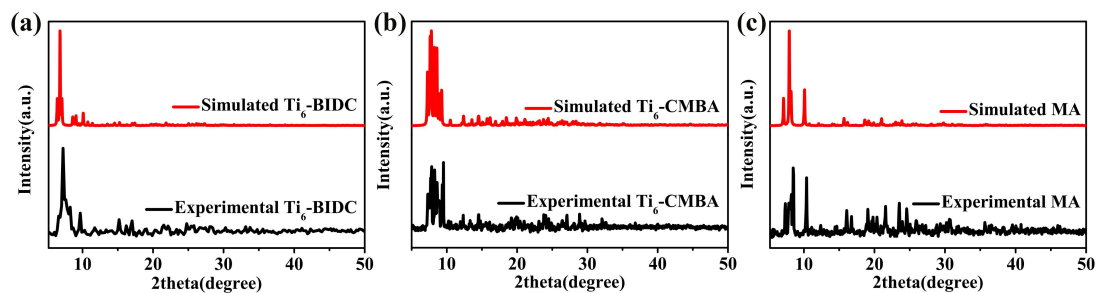

**Figure S3.** The as-synthesized and simulated PXRD patterns for (a)  $Ti_6$ -BIDC, (b)  $Ti_6$ -CMBA and (c)  $Ti_6$ -MA.

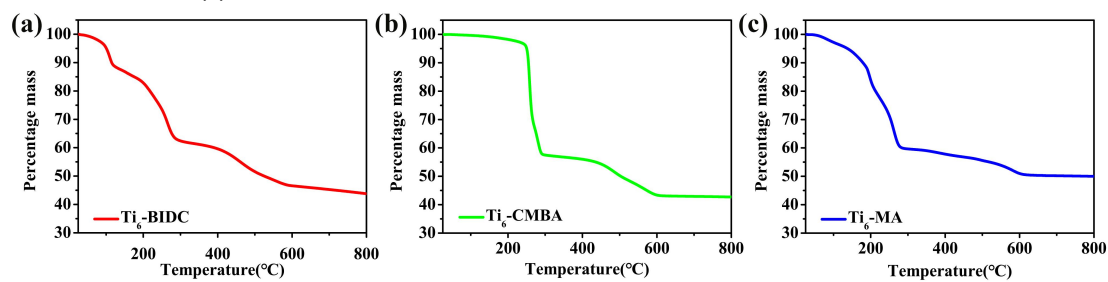

**Figure S4.** Thermal gravimetric analysis of (a)  $Ti_6$ -BIDC, (b)  $Ti_6$ -CMBA and (c)  $Ti_6$ -MA.

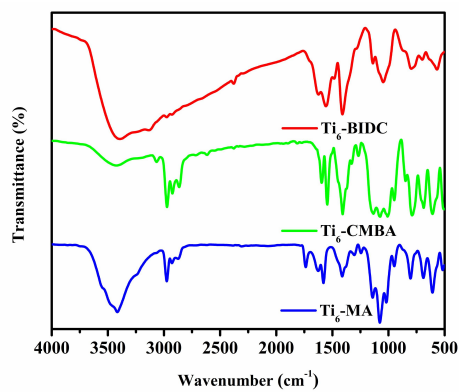

**Figure S5.** FT-IR spectrum of  $Ti_6$ -BIDC,  $Ti_6$ -CMBA and  $Ti_6$ -MA.

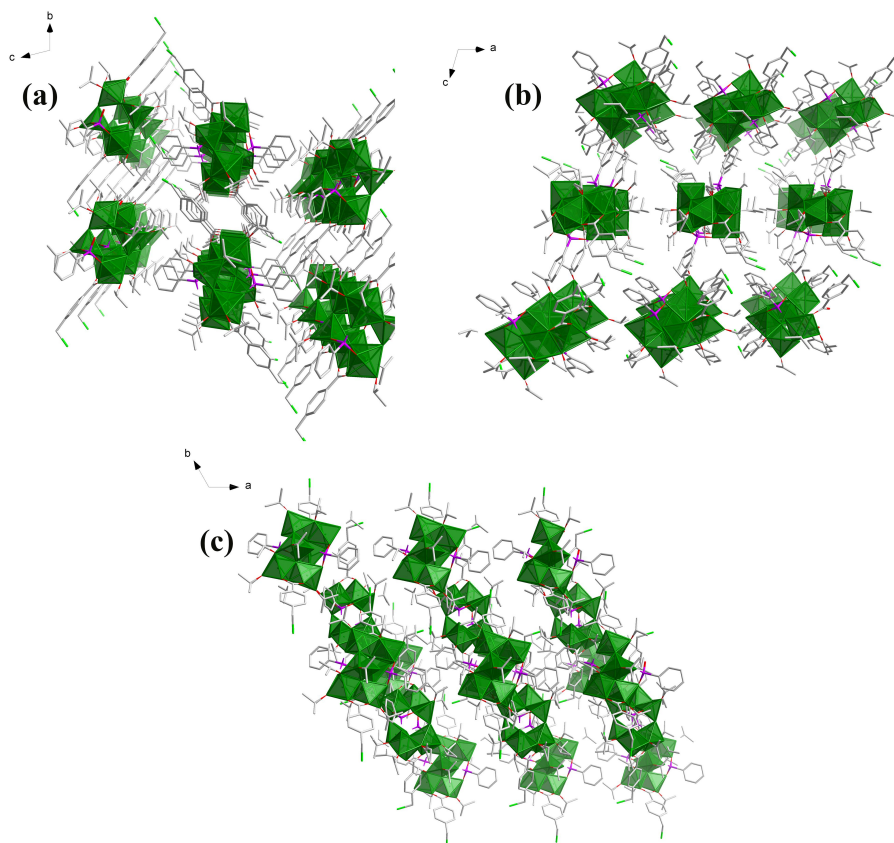

**Figure S6.** Molecular packing of compounds  $Ti_6$ -CMBA.

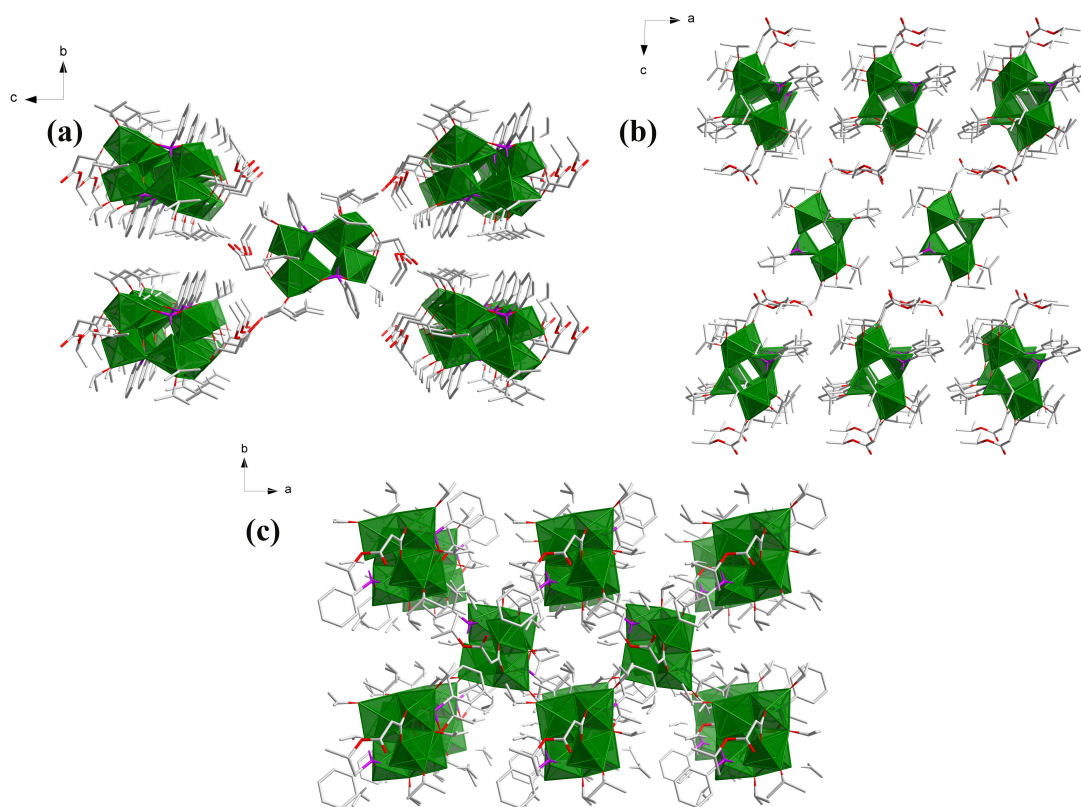

**Figure S7.** Molecular packing of compounds  $Ti_6$ -MA.

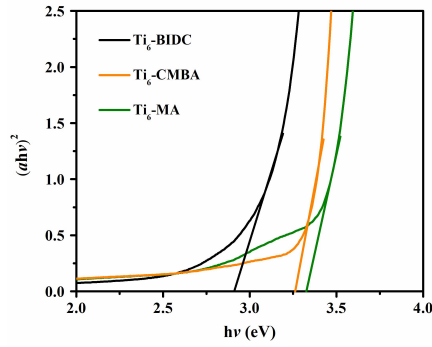

**Figure S8.** Curve  $[F(R)hv]^{1/2}$  versus photon energy of  $Ti_6$ -BIDC,  $Ti_6$ -CMBA and  $Ti_6$ -MA.

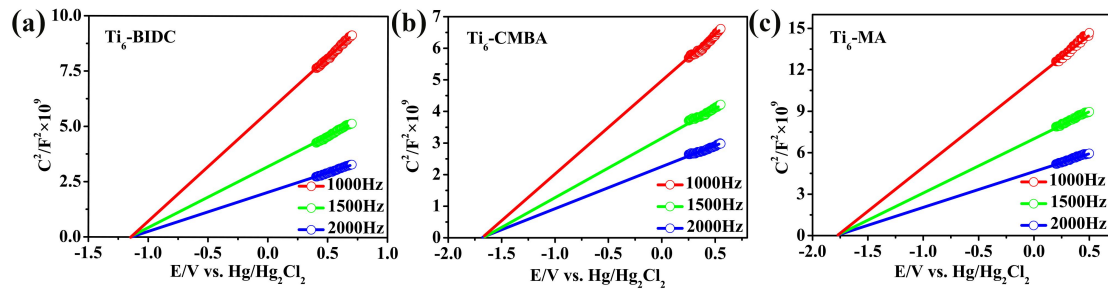

**Figure S9.** Mott-Schottky of (a)  $Ti_6$ -BIDC, (b)  $Ti_6$ -CMBA and (c)  $Ti_6$ -MA .

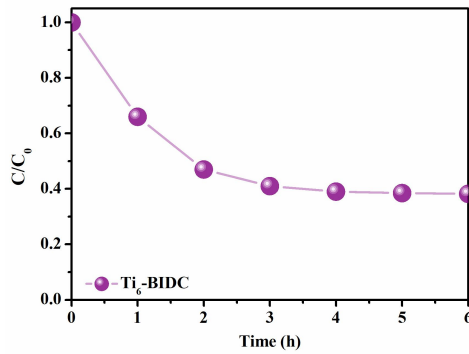

**Figure S10.** Adsorption equilibrium curve of  $Ti_6$ -BIDC.

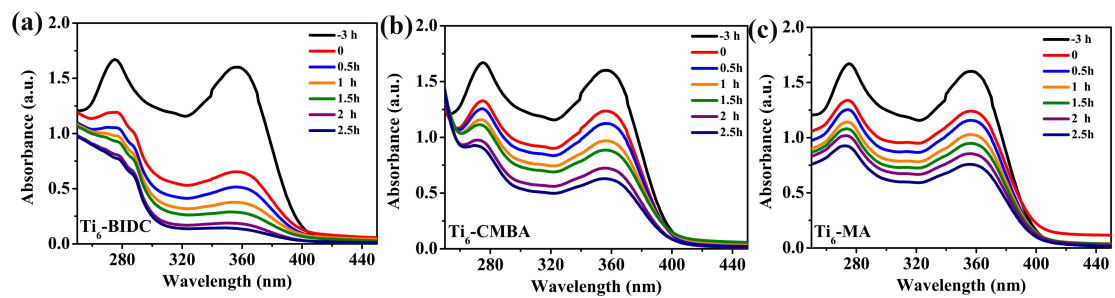

**Figure S11.** UV-vis spectrum of (a)  $Ti_6$ -BIDC, (b)  $Ti_6$ -CMBA and (c)  $Ti_6$ -MA.

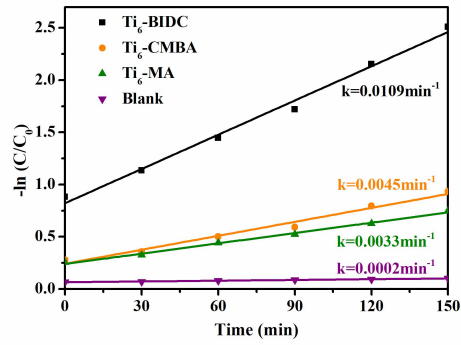

**Figure S12.** The kinetics plots of photocatalytic TC over Ti<sub>6</sub>-BIDC, Ti<sub>6</sub>-CMBA and Ti<sub>6</sub>-MA towards TC (50 mg/L).

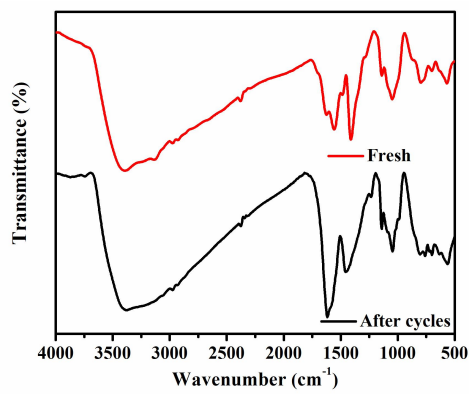

**Figure S13.** IR spectrum of Ti<sub>6</sub>-BIDC clusters before cycles and after cycles.



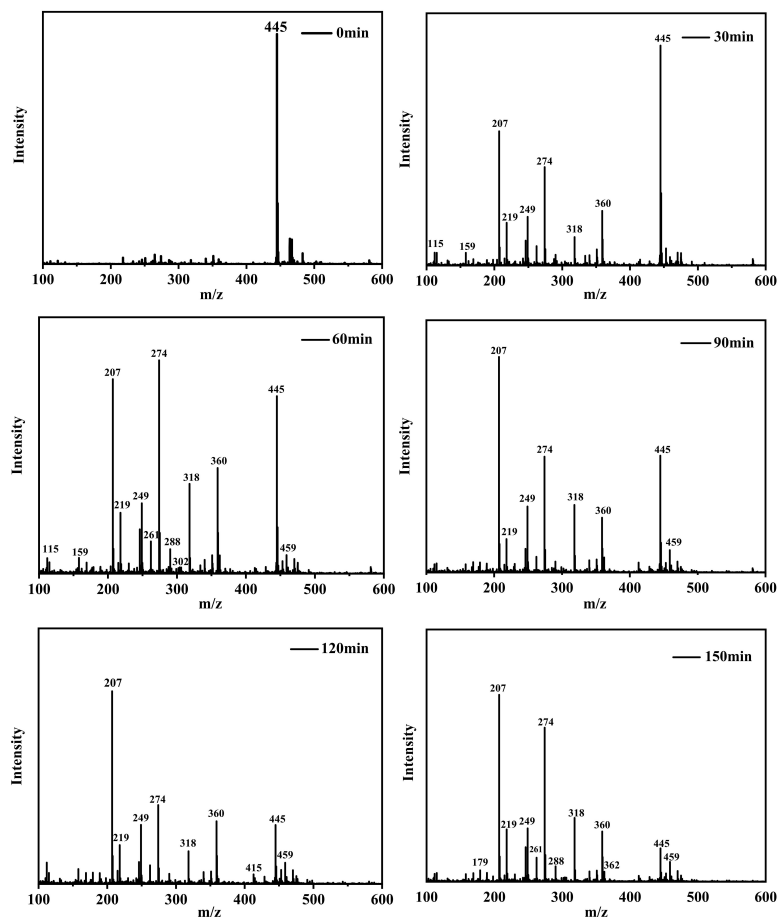

**Figure S14.** LC-MS mass spectra of TC photodegradation after 0, 30, 60, 90, 120 and 150 min, respectively.

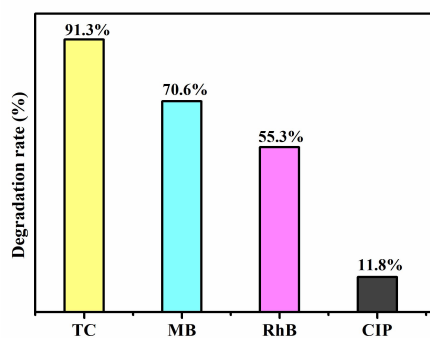

**Figure S15.** Photocatalytic degradation of MB, RhB, CIP pollutants.

**Table S1** Crystallographic Data and Structure Refinements for  $Ti_6$ -BIDC,  $Ti_6$ -CMBA and  $Ti_6$ -MA.

|                                      | 1                               | 2                                   | 3                           |
|--------------------------------------|---------------------------------|-------------------------------------|-----------------------------|
| Formula                              | $C_{75}H_{128}N_4O_{33}P_2Ti_6$ | $C_{59.5}H_{96}O_{24.5}P_2Cl_2Ti_6$ | $C_{54}H_{98}O_{28}P_2Ti_6$ |
| Formula weight( $g \cdot mol^{-1}$ ) | 1963.15                         | 1623.6                              | 1544.66                     |

| Crystal system                     | Triclinic       | Triclinic      | Monoclinic     |
|------------------------------------|-----------------|----------------|----------------|
| Space group                        | $P\bar{1}$      | $P\bar{1}$     | $P2_1/n$       |
| $a(\text{\AA})$                    | 13.346(3)       | 13.5725(4)     | 12.3094(11)    |
| $b(\text{\AA})$                    | 13.772(4)       | 14.3640(4)     | 12.5953(8)     |
| $c(\text{\AA})$                    | 14.419(4)       | 23.7811(7)     | 25.115(2)      |
| $\alpha(\text{deg})$               | 85.210(8)       | 97.3311(9)     | 90             |
| $\beta(\text{deg})$                | 80.905(8)       | 100.9082(9)    | 93.121(3)      |
| $\gamma(\text{deg})$               | 76.396(8)       | 117.1734(9)    | 90             |
| $V(\text{\AA}^3)$                  | 2540.7(11)      | 3926.6(2)      | 3888.0(5)      |
| Z                                  | 1               | 2              | 2              |
| $D_c(\text{g}\cdot\text{cm}^{-3})$ | 1.283           | 1.373          | 1.319          |
| $\mu(\text{mm}^{-1})$              | 0.554           | 0.758          | 0.698          |
| $F(000)$                           | 1032            | 1690           | 1616           |
| GOF on $F^2$                       | 1.055           | 1.090          | 1.018          |
| $R_1, wR_2 (I \geq 2\sigma(I))$    | 0.0957, 0.1992, | 0.0707, 0.1688 | 0.0624, 0.1625 |
| $R_1, wR_2$ (all data)             | 0.1522, 0.2188  | 0.1024, 0.1925 | 0.1268, 0.1933 |

**Table S2** Some main Bond length information.

| Some main bond length information of Ti <sub>6</sub> -BIDC |            |          |            |          |            |
|------------------------------------------------------------|------------|----------|------------|----------|------------|
| Bond                                                       | Length     | Bond     | Length     | Bond     | Length     |
| P1- O1                                                     | 1.5249(43) | Ti1- O14 | 2.0474(50) | Ti2- O11 | 2.1183(52) |
| P1- O3                                                     | 1.5300(47) | Ti1- O4  | 2.1493(49) | Ti3- O13 | 1.7511(49) |
| P1- O2                                                     | 1.5315(41) | Ti2- O9  | 1.7597(43) | Ti3- O3  | 1.9328(45) |
| P1- C1                                                     | 1.7820(73) | Ti2- O8  | 1.8284(45) | Ti3- O12 | 1.9733(45) |
| Ti1- O10                                                   | 1.7715(50) | Ti2- O2  | 1.9455(41) | Ti3- O14 | 1.9812(42) |
| Ti1- O9                                                    | 1.8671(48) | Ti2- O12 | 2.0366(42) | Ti3- O8  | 2.0221(43) |
| Ti1- O1                                                    | 1.9735(45) | Ti2- O6  | 2.0639(53) | Ti3- O5  | 2.0468(55) |
| Ti1- O8                                                    | 2.0113(40) |          |            |          |            |
| Some main bond length information of Ti <sub>6</sub> -CMBA |            |          |            |          |            |
| Ti1- O8                                                    | 1.7947(46) | Ti3- O7  | 1.8971(29) | Ti6- O24 | 1.7920(68) |
| Ti1- O6                                                    | 1.8576(35) | Ti3- O2  | 1.9541(48) | Ti6- O18 | 1.8725(32) |

|                                                          |            |          |            |          |            |
|----------------------------------------------------------|------------|----------|------------|----------|------------|
| Ti1- O1                                                  | 1.9622(35) | Ti3- O11 | 2.0213(41) | Ti6- O14 | 1.9404(42) |
| Ti1- O7                                                  | 1.9869(38) | Ti4- O18 | 1.7660(47) | Ti6- O19 | 1.9795(49) |
| Ti1- O9                                                  | 2.0073(41) | Ti4- O20 | 1.7931(40) | Ti6- O23 | 2.0274(44) |
| Ti1- O4                                                  | 2.1514(40) | Ti4- O19 | 1.9161(45) | Ti6- O17 | 2.1434(33) |
| Ti2- O10                                                 | 1.7552(38) | Ti4- O13 | 1.9632(43) | P1- O2   | 1.5203(47) |
| Ti2- O3                                                  | 1.9474(45) | Ti4- O21 | 2.0325(49) | P1- O3   | 1.5215(40) |
| Ti2- O11                                                 | 1.9605(34) | Ti5- O22 | 1.7696(55) | P1- O1   | 1.5239(30) |
| Ti2- O9                                                  | 1.9867(45) | Ti5- O15 | 1.9438(40) | P1- C1   | 1.7855(62) |
| Ti2- O7                                                  | 1.9968(39) | Ti5- O21 | 1.9622(55) | P2- O13  | 1.5164(43) |
| Ti2- O5                                                  | 2.0771(47) | Ti5- O23 | 1.9664(59) | P2- O15  | 1.5213(40) |
| Ti3- O6                                                  | 1.7692(30) | Ti5- O19 | 1.9798(40) | P2- O14  | 1.5247(49) |
| Ti3- O12                                                 | 1.7985(41) | Ti5- O16 | 2.0836(40) | P2- C30  | 1.7873(58) |
| Some main bond length information of Ti <sub>6</sub> -MA |            |          |            |          |            |
| P1- O3                                                   | 1.5126(26) | Ti1- O14 | 1.9792(28) | Ti2- O14 | 1.9800(28) |
| P1- O1                                                   | 1.5264(35) | Ti1- O9  | 2.0282(34) | Ti2- O5  | 2.0776(28) |
| P1- O2                                                   | 1.5270(29) | Ti1- O4  | 2.1564(30) | Ti3- O13 | 1.7443(25) |
| P1- C1                                                   | 1.7837(52) | Ti2- O10 | 1.7528(38) | Ti3- O12 | 1.7828(42) |
| Ti1- O8                                                  | 1.7735(29) | Ti2- O3  | 1.9368(28) | Ti3- O14 | 1.9044(27) |
| Ti1- O13                                                 | 1.8644(29) | Ti2- O11 | 1.9648(35) | Ti3- O2  | 1.9795(31) |
| Ti1- O1                                                  | 1.9568(36) | Ti2- O9  | 1.9750(31) | Ti3- O11 | 2.0369(32) |

**Table S3** Some main bond Angle information.

|                                               |           |              |           |               |            |
|-----------------------------------------------|-----------|--------------|-----------|---------------|------------|
| Some main bond angle of Ti <sub>6</sub> -BIDC |           |              |           |               |            |
| O1- P1- O3                                    | 111.2(3)  | O8- Ti2- O2  | 92.49(19) | O14- Ti3- O8  | 75.26(18)  |
| O1- P1- O2                                    | 113.0(3)  | O9- Ti2- O12 | 96.4(2)   | O13- Ti3- O5  | 87.2(2)    |
| O3- P1- O2                                    | 110.7(3)  | O8- Ti2- O12 | 78.41(18) | O3- Ti3- O5   | 177.4(2)   |
| O1- P1- C1                                    | 109.6(3)  | O2- Ti2- O12 | 167.3(2)  | O12- Ti3- O5  | 87.3(2)    |
| O3- P1- C1                                    | 106.3(3)  | O9- Ti2- O6  | 166.8(2)  | O14- Ti3- O5  | 87.7(2)    |
| O2- P1- C1                                    | 105.6(3)  | O8- Ti2- O6  | 88.9(2)   | O8- Ti3- O5   | 85.75(19)  |
| O10- Ti1- O9                                  | 97.2(2)   | O2- Ti2- O6  | 84.62(19) | O13- Ti3- Ti2 | 143.81(18) |
| O10- Ti1- O1                                  | 100.1(2)  | O12- Ti2- O6 | 86.39(19) | O3- Ti3- Ti2  | 92.76(15)  |
| O9- Ti1- O1                                   | 94.52(19) | O9- Ti2- O11 | 90.2(2)   | O12- Ti3- Ti2 | 40.64(12)  |
| O10- Ti1- O8                                  | 164.2(2)  | O8- Ti2- O11 | 163.8(2)  | O14- Ti3- Ti2 | 110.04(14) |

|                                                |            |               |            |               |            |
|------------------------------------------------|------------|---------------|------------|---------------|------------|
| O9- Ti1- O8                                    | 96.49(19)  | O2- Ti2- O11  | 93.39(19)  | O8- Ti3- Ti2  | 34.87(12)  |
| O1- Ti1- O8                                    | 86.62(18)  | O12- Ti2- O11 | 93.22(19)  | O5- Ti3- Ti2  | 84.80(14)  |
| O10- Ti1- O14                                  | 97.6(2)    | O6- Ti2- O11  | 76.7(2)    | O13- Ti3- Ti1 | 140.44(19) |
| O9- Ti1- O14                                   | 92.1(2)    | O9- Ti2- Ti3  | 104.24(16) | O3- Ti3- Ti1  | 101.28(14) |
| O1- Ti1- O14                                   | 160.13(18) | O8- Ti2- Ti3  | 39.21(13)  | O12- Ti3- Ti1 | 112.12(13) |
| O8- Ti1- O14                                   | 74.01(17)  | O2- Ti2- Ti3  | 130.94(14) | O14- Ti3- Ti1 | 38.60(13)  |
| O10- Ti1- O4                                   | 84.9(2)    | O12- Ti2- Ti3 | 39.20(13)  | O8- Ti3- Ti1  | 37.81(12)  |
| O9- Ti1- O4                                    | 177.68(18) | O6- Ti2- Ti3  | 86.13(14)  | O5- Ti3- Ti1  | 78.72(13)  |
| O1- Ti1- O4                                    | 86.06(19)  | O11- Ti2- Ti3 | 130.71(15) | Ti2- Ti3- Ti1 | 71.87(4)   |
| O8- Ti1- O4                                    | 81.30(18)  | O13- Ti3- O3  | 94.3(2)    | P1- O1- Ti1   | 136.2(3)   |
| O14- Ti1- O4                                   | 86.62(19)  | O13- Ti3- O12 | 103.8(2)   | P1- O2- Ti2   | 133.7(3)   |
| O10- Ti1- Ti3                                  | 130.26(17) | O3- Ti3- O12  | 90.3(2)    | P1- O3- Ti3   | 150.1(3)   |
| O9- Ti1- Ti3                                   | 102.33(14) | O13- Ti3- O14 | 104.8(2)   | Ti2- O8- Ti1  | 146.1(2)   |
| O1- Ti1- Ti3                                   | 123.04(13) | O3- Ti3- O14  | 93.8(2)    | Ti2- O8- Ti3  | 105.9(2)   |
| O8- Ti1- Ti3                                   | 38.04(12)  | O12- Ti3- O14 | 150.63(19) | Ti1- O8- Ti3  | 104.15(19) |
| O14- Ti1- Ti3                                  | 37.10(13)  | O13- Ti3- O8  | 172.9(2)   | Ti2- O9- Ti1  | 148.3(3)   |
| O4- Ti1- Ti3                                   | 75.50(12)  | O3- Ti3- O8   | 92.70(19)  | Ti3- O12- Ti2 | 100.15(18) |
| O9- Ti2- O8                                    | 104.3(2)   | O12- Ti3- O8  | 75.50(17)  | Ti3- O14- Ti1 | 104.3(2)   |
| O9- Ti2- O2                                    | 94.3(2)    |               |            |               |            |
| Some main Bond Angles of Ti <sub>6</sub> -CMBA |            |               |            |               |            |
| O8- Ti1- O6                                    | 97.21(15)  | O7- Ti3- O11  | 76.22(14)  | O14- Ti6- O23 | 162.85(17) |
| O8- Ti1- O1                                    | 94.40(15)  | O2- Ti3- O11  | 158.54(14) | O19- Ti6- O23 | 75.47(15)  |
| O6- Ti1- O1                                    | 94.04(14)  | O6- Ti3- Ti2  | 111.95(11) | O24- Ti6- O17 | 82.65(19)  |
| O8- Ti1- O7                                    | 163.70(14) | O12- Ti3- Ti2 | 116.29(15) | O18- Ti6- O17 | 176.88(17) |
| O6- Ti1- O7                                    | 98.67(13)  | O7- Ti3- Ti2  | 38.25(9)   | O14- Ti6- O17 | 88.82(16)  |
| O1- Ti1- O7                                    | 88.13(13)  | O2- Ti3- Ti2  | 124.64(10) | O19- Ti6- O17 | 80.99(16)  |
| O8- Ti1- O9                                    | 100.22(15) | O11- Ti3- Ti2 | 38.05(10)  | O23- Ti6- O17 | 84.65(16)  |
| O6- Ti1- O9                                    | 91.65(14)  | O6- Ti3- Ti1  | 21.19(10)  | O24- Ti6- Ti5 | 133.28(15) |
| O1- Ti1- O9                                    | 163.51(14) | O12- Ti3- Ti1 | 132.69(15) | O18- Ti6- Ti5 | 101.05(12) |
| O7- Ti1- O9                                    | 75.71(14)  | O7- Ti3- Ti1  | 90.69(9)   | O14- Ti6- Ti5 | 124.98(12) |
| O8- Ti1- O4                                    | 82.96(14)  | O2- Ti3- Ti1  | 95.33(10)  | O19- Ti6- Ti5 | 37.98(10)  |
| O6- Ti1- O4                                    | 178.37(15) | O11- Ti3- Ti1 | 99.88(10)  | O23- Ti6- Ti5 | 37.95(12)  |

|               |            |               |            |               |            |
|---------------|------------|---------------|------------|---------------|------------|
| O1- Ti1- O4   | 87.55(14)  | Ti2- Ti3- Ti1 | 98.58(3)   | O17- Ti6- Ti5 | 76.39(12)  |
| O7- Ti1- O4   | 81.06(12)  | O18- Ti4- O20 | 108.5(2)   | O2- P1- O3    | 111.29(19) |
| O9- Ti1- O4   | 86.72(14)  | O18- Ti4- O19 | 110.77(17) | O2- P1- O1    | 111.78(19) |
| O8- Ti1- Ti2  | 133.53(12) | O20- Ti4- O19 | 140.2(2)   | O3- P1- O1    | 112.82(19) |
| O6- Ti1- Ti2  | 102.16(10) | O18- Ti4- O13 | 99.84(18)  | O2- P1- C1    | 106.5(2)   |
| O1- Ti1- Ti2  | 125.38(10) | O20- Ti4- O13 | 91.1(2)    | O3- P1- C1    | 107.1(2)   |
| O7- Ti1- Ti2  | 38.29(9)   | O19- Ti4- O13 | 88.48(16)  | O1- P1- C1    | 106.9(2)   |
| O9- Ti1- Ti2  | 38.13(10)  | O18- Ti4- O21 | 100.53(17) | O13- P2- O15  | 111.5(2)   |
| O4- Ti1- Ti2  | 76.62(9)   | O20- Ti4- O21 | 91.0(2)    | O13- P2- O14  | 111.7(2)   |
| O8- Ti1- Ti3  | 116.34(11) | O19- Ti4- O21 | 75.87(16)  | O15- P2- O14  | 112.6(3)   |
| O6- Ti1- Ti3  | 20.14(10)  | O13- Ti4- O21 | 157.70(17) | O13- P2- C30  | 107.5(3)   |
| O1- Ti1- Ti3  | 86.30(9)   | O18- Ti4- Ti5 | 112.21(13) | O15- P2- C30  | 107.1(3)   |
| O7- Ti1- Ti3  | 79.86(9)   | O20- Ti4- Ti5 | 118.3(2)   | O14- P2- C30  | 106.0(2)   |
| O9- Ti1- Ti3  | 93.93(10)  | O19- Ti4- Ti5 | 37.82(11)  | P1- O1- Ti1   | 137.42(19) |
| O4- Ti1- Ti3  | 160.12(10) | O13- Ti4- Ti5 | 123.76(12) | P1- O2- Ti3   | 135.8(2)   |
| Ti2- Ti1- Ti3 | 91.66(3)   | O21- Ti4- Ti5 | 38.17(13)  | P1- O3- Ti2   | 147.0(2)   |
| O10- Ti2- O3  | 92.77(16)  | O22- Ti5- O15 | 92.3(2)    | C7- O4- Ti1   | 129.1(3)   |
| O10- Ti2- O11 | 105.62(18) | O22- Ti5- O21 | 103.4(2)   | C7- O5- Ti2   | 128.8(3)   |
| O3- Ti2- O11  | 91.80(14)  | O15- Ti5- O21 | 92.52(19)  | Ti3- O6- Ti1  | 138.67(19) |
| O10- Ti2- O9  | 102.27(18) | O22- Ti5- O23 | 103.0(2)   | Ti3- O7- Ti1  | 146.25(17) |
| O3- Ti2- O9   | 94.49(14)  | O15- Ti5- O23 | 93.99(19)  | Ti3- O7- Ti2  | 105.72(14) |
| O11- Ti2- O9  | 151.04(14) | O21- Ti5- O23 | 152.50(16) | Ti1- O7- Ti2  | 103.64(15) |
| O10- Ti2- O7  | 173.06(15) | O22- Ti5- O19 | 174.7(2)   | C16- O8- Ti1  | 141.2(3)   |
| O3- Ti2- O7   | 94.05(13)  | O15- Ti5- O19 | 92.98(16)  | C19- O9- Ti2  | 134.7(4)   |
| O11- Ti2- O7  | 75.43(13)  | O21- Ti5- O19 | 76.11(16)  | C19- O9- Ti1  | 121.8(4)   |
| O9- Ti2- O7   | 75.94(13)  | O23- Ti5- O19 | 76.88(15)  | Ti2- O9- Ti1  | 103.27(15) |
| O10- Ti2- O5  | 87.93(15)  | O22- Ti5- O16 | 88.99(19)  | C22- O10- Ti2 | 170.9(5)   |
| O3- Ti2- O5   | 178.58(16) | O15- Ti5- O16 | 178.67(17) | C25- O11- Ti2 | 134.7(4)   |
| O11- Ti2- O5  | 86.83(15)  | O21- Ti5- O16 | 87.32(18)  | C25- O11- Ti3 | 122.8(4)   |
| O9- Ti2- O5   | 86.56(14)  | O23- Ti5- O16 | 85.56(17)  | Ti2- O11- Ti3 | 102.48(14) |
| O7- Ti2- O5   | 85.27(13)  | O19- Ti5- O16 | 85.70(15)  | C28- O12- Ti3 | 146.3(5)   |
| O10- Ti2- Ti3 | 144.17(15) | O22- Ti5- Ti4 | 142.5(2)   | P2- O13- Ti4  | 133.8(2)   |

|                                              |            |               |            |               |            |
|----------------------------------------------|------------|---------------|------------|---------------|------------|
| O3- Ti2- Ti3                                 | 95.61(11)  | O15- Ti5- Ti4 | 95.81(13)  | P2- O14- Ti6  | 138.3(2)   |
| O11- Ti2- Ti3                                | 39.48(10)  | O21- Ti5- Ti4 | 39.80(12)  | P2- O15vTi5   | 149.3(3)   |
| O9- Ti2- Ti3                                 | 111.67(10) | O23- Ti5- Ti4 | 112.86(11) | C36- O16- Ti5 | 128.0(4)   |
| O7- Ti2- Ti3                                 | 36.03(9)   | O19- Ti5- Ti4 | 36.43(11)  | C36- O17- Ti6 | 130.0(4)   |
| O5- Ti2- Ti3                                 | 83.11(11)  | O16- Ti5- Ti4 | 83.23(12)  | Ti4- O18- Ti6 | 139.8(2)   |
| O10- Ti2- Ti1                                | 138.76(15) | O22- Ti5- Ti6 | 140.89(19) | Ti4- O19- Ti5 | 105.75(18) |
| O3- Ti2- Ti1                                 | 101.11(10) | O15- Ti5- Ti6 | 99.08(14)  | Ti4- O19- Ti6 | 145.97(19) |
| O11- Ti2- Ti1                                | 112.45(10) | O21- Ti5- Ti6 | 113.19(12) | Ti5- O19- Ti6 | 104.01(16) |
| O9- Ti2- Ti1                                 | 38.59(10)  | O23- Ti5- Ti6 | 39.35(10)  | C45- O20- Ti4 | 131.2(8)   |
| O7- Ti2- Ti1                                 | 38.07(9)   | O19- Ti5- Ti6 | 38.01(11)  | C48- O21- Ti5 | 133.2(5)   |
| O5- Ti2- Ti1                                 | 79.12(10)  | O16- Ti5- Ti6 | 79.78(12)  | C48- O21- Ti4 | 124.7(5)   |
| Ti3- Ti2Ti1                                  | 73.17(3)   | Ti4- Ti5- Ti6 | 73.52(3)   | Ti5- O21- Ti4 | 102.03(18) |
| O6- Ti3- O12                                 | 111.63(18) | O24- Ti6- O18 | 98.03(19)  | C51- O22- Ti5 | 177.3(7)   |
| O6- Ti3- O7                                  | 111.44(14) | O24- Ti6- O14 | 95.35(18)  | C54- O23- Ti5 | 121.1(9)   |
| O12- Ti3- O7                                 | 136.48(17) | O18- Ti6- O14 | 94.14(17)  | C54- O23- Ti6 | 136.0(9)   |
| O6- Ti3- O2                                  | 99.54(15)  | O24- Ti6- O19 | 163.26(19) | Ti5- O23- Ti6 | 102.70(16) |
| O12- Ti3- O2                                 | 90.25(16)  | O18- Ti6- O19 | 98.12(16)  | Ti6- O24- C57 | 136.6(11)  |
| O7- Ti3- O2                                  | 88.61(13)  | O14- Ti6- O19 | 87.86(15)  | C6- C1- P1    | 120.4(4)   |
| O6- Ti3- O11                                 | 100.10(14) | O24- Ti6- O23 | 99.50(18)  | C2- C1- P1    | 120.8(4)   |
| O12- Ti3- O11                                | 90.48(17)  | O18- Ti6- O23 | 92.23(16)  |               |            |
| Some main Bond Angles of Ti <sub>6</sub> -MA |            |               |            |               |            |
| O3- P1- O2                                   | 111.32(19) | O10- Ti2- O9  | 103.69(15) | O14- Ti3- O2  | 87.67(13)  |
| O3- P1- O1                                   | 112.2(2)   | O3- Ti2- O9   | 93.71(14)  | O13- Ti3- O11 | 100.48(14) |
| O2- P1- O1                                   | 112.24(18) | O11- Ti2- O9  | 153.05(13) | O12- Ti3- O11 | 91.38(15)  |
| O3- P1- C1                                   | 105.7(2)   | O10- Ti2- O14 | 172.84(16) | O14- Ti3- O11 | 76.21(12)  |
| O2- P1- C1                                   | 108.0(2)   | O3- Ti2- O14  | 93.85(13)  | O2- Ti3- O11  | 157.27(14) |
| O1- P1- C1                                   | 107.0(2)   | O11- Ti2- O14 | 76.12(12)  | O13- Ti3- Ti2 | 108.77(11) |
| O8- Ti1- O13                                 | 97.81(15)  | O9- Ti2- O14  | 77.09(12)  | O12- Ti3- Ti2 | 119.90(14) |
| O8- Ti1- O1                                  | 96.16(14)  | O10- Ti2- O5  | 88.55(15)  | O14- Ti3- Ti2 | 37.86(9)   |
| O13- Ti1- O1                                 | 95.33(14)  | O3- Ti2- O5   | 178.24(13) | O2- Ti3- Ti2  | 123.98(10) |
| O8- Ti1- O14                                 | 164.29(15) | O11- Ti2- O5  | 88.66(14)  | O11- Ti3- Ti2 | 38.35(9)   |
| O13- Ti1- O14                                | 97.06(13)  | O9- Ti2- O5   | 85.86(14)  | P1- O1- Ti1   | 135.67(18) |

|               |            |               |            |               |            |
|---------------|------------|---------------|------------|---------------|------------|
| O1- Ti1- O14  | 87.49(12)  | O14- Ti2- O5  | 84.39(13)  | P1- O2- Ti3   | 132.0(2)   |
| O8- Ti1- O9   | 98.96(14)  | O10- Ti2- Ti3 | 142.14(13) | P1- O3- Ti2   | 156.3(2)   |
| O13- Ti1- O9  | 90.10(14)  | O3- Ti2- Ti3  | 92.69(10)  | C7- O4- Ti1   | 128.9(3)   |
| O1- Ti1- O9   | 163.08(13) | O11- Ti2- Ti3 | 39.99(9)   | C7- O5- Ti2   | 128.2(3)   |
| O14- Ti1- O9  | 75.93(12)  | O9- Ti2- Ti3  | 113.19(9)  | C14- O8- Ti1  | 151.5(4)   |
| O8- Ti1- O4   | 83.75(15)  | O14- Ti2- Ti3 | 36.13(8)   | C17- O9- Ti2  | 130.8(4)   |
| O13- Ti1- O4  | 174.06(14) | O5- Ti2- Ti3  | 85.9(1)    | C17- O9- Ti1  | 126.7(4)   |
| O1- Ti1- O4   | 90.19(14)  | O10- Ti2- Ti1 | 141.46(12) | Ti2- O9- Ti1  | 102.39(14) |
| O14- Ti1- O4  | 80.95(12)  | O3- Ti2- Ti1  | 98.85(9)   | C20- O10- Ti2 | 178.0(5)   |
| O9- Ti1- O4   | 83.99(13)  | O11- Ti2- Ti1 | 113.64(9)  | C23- O11- Ti2 | 125.5(3)   |
| O8- Ti1- Ti2  | 133.69(12) | O9- Ti2- Ti1  | 39.40(9)   | C23- O11- Ti3 | 132.4(3)   |
| O13- Ti1- Ti2 | 98.46(10)  | O14- Ti2- Ti1 | 38.03(8)   | Ti2- O11- Ti3 | 101.65(13) |
| O1- Ti1- Ti2  | 124.93(9)  | O5- Ti2- Ti1  | 79.74(9)   | C26- O12- Ti3 | 146.8(5)   |
| O14- Ti1- Ti2 | 38.07(9)   | Ti3- Ti2- Ti1 | 73.91(3)   | Ti3- O13- Ti1 | 148.04(19) |
| O9- Ti1- Ti2  | 38.21(9)   | O13- Ti3- O12 | 111.63(18) | Ti3- O14- Ti1 | 148.87(17) |
| O4- Ti1- Ti2  | 76.50(9)   | O13- Ti3- O14 | 109.56(14) | Ti3- O14- Ti2 | 106.01(13) |
| O10- Ti2- O3  | 93.21(15)  | O12- Ti3- O14 | 138.49(17) | Ti1- O14- Ti2 | 103.90(14) |
| O10- Ti2- O11 | 102.53(15) | O13- Ti3- O2  | 99.96(14)  | C6- C1- P1    | 120.4(4)   |
| O3- Ti2- O11  | 90.95(14)  | O12- Ti3- O2  | 90.25(15)  | C2- C1- P1    | 121.7(4)   |

**Table S4.** Bond valence sum (BVS) analysis for Ti<sub>6</sub>-BIDC, Ti<sub>6</sub>-CMBA and Ti<sub>6</sub>-MA.

|                       |               |       |       |       |       |       |       |       |       |
|-----------------------|---------------|-------|-------|-------|-------|-------|-------|-------|-------|
| Ti <sub>6</sub> -BIDC | Atoms         | Ti1   | Ti2   | Ti3   | P1    |       |       |       |       |
|                       | BVS           | 4.171 | 4.328 | 4.311 | 5.014 |       |       |       |       |
|                       | assigned O.S. | +4    | +4    | +4    | +5    |       |       |       |       |
| Ti <sub>6</sub> -CMBA | Atoms         | Ti1   | Ti2   | Ti3   | Ti4   | Ti5   | Ti6   | P1    | P2    |
|                       | BVS           | 4.245 | 4.282 | 4.237 | 4.188 | 4.296 | 4.248 | 5.071 | 5.076 |
|                       | assigned O.S. | +4    | +4    | +4    | +4    | +4    | +4    | +5    | +5    |
|                       | Atoms         | Ti1   | Ti2   | Ti3   | P1    |       |       |       |       |

|                     |                  |       |      |       |       |  |  |  |  |
|---------------------|------------------|-------|------|-------|-------|--|--|--|--|
| Ti <sub>6</sub> -MA | BVS              | 4.276 | 4.35 | 4.277 | 5.078 |  |  |  |  |
|                     | assigned<br>O.S. | +4    | +4   | +4    | +5    |  |  |  |  |

**Table S5.** The photocatalytic degradation of TC by different photocatalysts reported in literatures.

| Photocatalysts                                                                                              | Pollutant | Light source | Time (min) | Initial concentration of TC (mg/L) | Quantity of Photocatalyst (mg) | Removal efficiency (%) | References |
|-------------------------------------------------------------------------------------------------------------|-----------|--------------|------------|------------------------------------|--------------------------------|------------------------|------------|
| {(L1') <sub>1.5</sub> [CeMo <sub>8</sub> O <sub>27</sub> H <sub>2</sub> · (H <sub>2</sub> O) <sub>3</sub> } | TC        | 300 W<br>Xe  | 120        | 20                                 | 10                             | 90.5                   | [2]        |
| 10-NBM <sub>2</sub> /Cds                                                                                    | TC        | 300 W<br>Xe  | 150        | 20                                 | 20                             | 90.9                   | [3]        |
| π-COF                                                                                                       | TC        | 300 W<br>Xe  | 90         | 20                                 | 20                             | 94.8                   | [4]        |
| SP <sup>2</sup> C-COF                                                                                       | TC        | 300 W<br>Xe  | 90         | 20                                 | 20                             | 73.5                   | [5]        |
| V <sub>o</sub> -rich BWO                                                                                    | TC        | 300 W<br>Xe  | 60         | 20                                 | 30                             | 95.1                   | [6]        |
| N-CQDs/TiO <sub>2</sub>                                                                                     | TC        | 300 W<br>Xe  | 120        | 10                                 | 20                             | 97.7                   | [7]        |
| ZnO/Cu <sub>2</sub> O                                                                                       | TC        | 300 W<br>Xe  | 120        | 20                                 | 10                             | 95.3                   | [8]        |
| Ti <sub>6</sub> -BIDC                                                                                       | TC        | Sunlight     | 150        | 50                                 | 10                             | 92.4                   | This work  |

## References

- 1 Y. Zhou, T. Cai, S. Liu, Y. Liu, H. Chen, Z. Li, J. Du, Z. Lei and H. Peng, *Chem. Eng. J.*, 2021, **411**, 128615.
- 2 C. Ren, X. Zhang, C. Chen and Y. Niu, *J. M. Struct.*, 2024, **1316**, 139062.
- 3 R. Zhang, K. Jia, Z. Xue, Z. Hu and N. Yuan, *J. Alloys compd.*, 2024, **992**, 174462.
- 4 Z. Hu, Y. Wang, L. Wang, Q. Wang, Q. Zhang, F. Cui and G. Jiang, *Chem. Eng. J.*, 2024, **479**, 147534.
- 5 Z. Hu, Y. Luo, L. Wang, Y. Wang, Q. Wang, G. Jiang, Q. Zhang and F. Cui, *ACS Appl. Polym. Mater.*, 2023, **5**, 9263- 9273.
- 6 W. Gao, G. Li, Q. Wang, L. Zhang, K. Wang, S. Pang, G. Zhang, L. Lv, X. Liu, W. Gao, L.



Sun, Y. Xia, Z. Ren and P. Wang, Chem. Eng. J., 2023, **464**, 142694.

7 M. Karaca, Z. Erođ lu, Ö . Aç ıř lı, Ö . Metin and S. Karaca, ACS Omega, 2023, **8**, 26597-26609.

8 J. Cui, L. Ye, X. Chen, J. Li, B. Yang, M. Yang, Q. Yang, D. Yun and S. Sun, Appl. Surf. Sci., 2023, **638**, 158046.
